# Supplementary material for: Specific Subtypes of Carcinoma-Associated Fibroblasts Are Correlated with Worse Survival in Resectable Pancreatic Ductal Adenocarcinoma
Source: MDPI journal article supplement (doi:10.3390/cancers15072049), 2023-03-30
Supplement: s1 [file s1]

## Supplement Information

**Supplementary Figure S1.** Representative images of the performed immunohistochemical stainings (left: low, right: high): (A) FAP, (B) PDGFR beta, (C) Periostin, and (D) SMA. Scale bar: 50  $\mu$ m

A

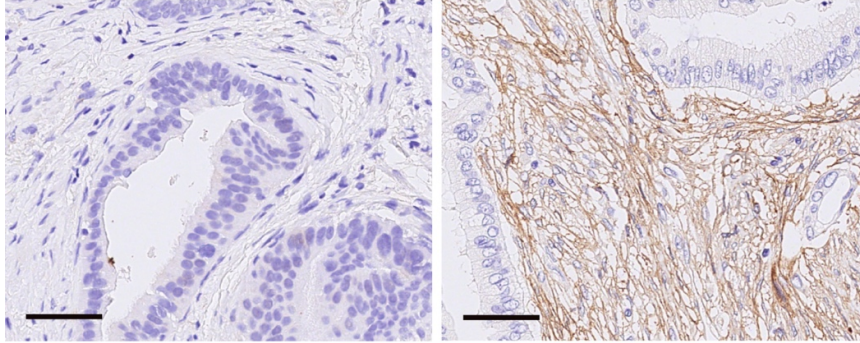

B

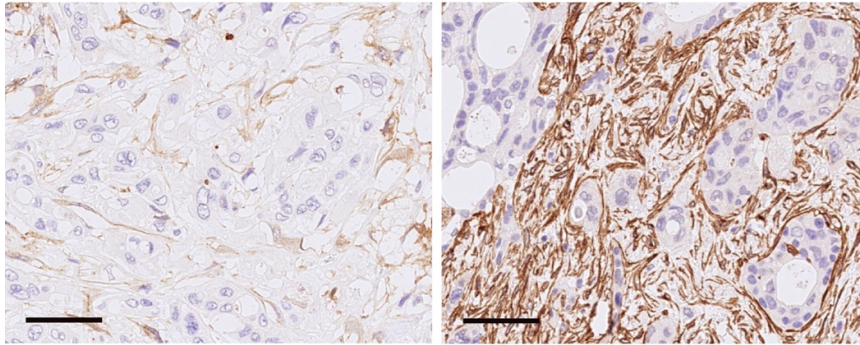

C

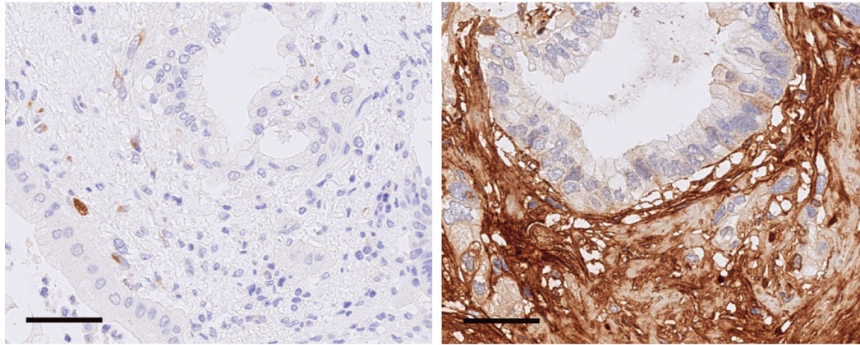

D

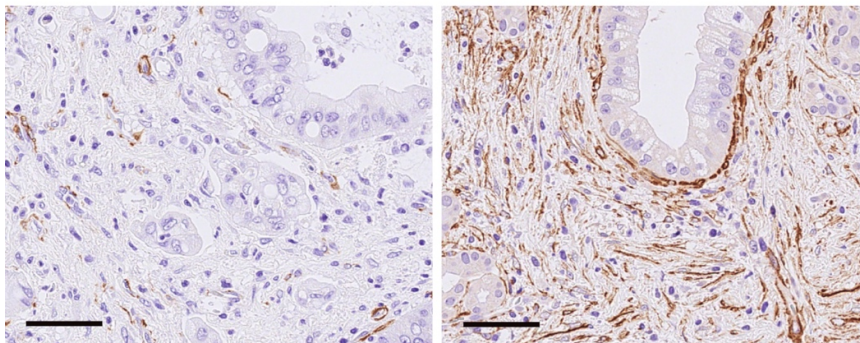

**Supplementary Table S1.** Detailed antibody information. A: appendix vermiciformis, w/o: without pretreatment.

| Antibody   | Manufacturer | Clone       | Dilution | Pretreatment | Control tissue | Positive control     | Negative control | Order number |
|------------|--------------|-------------|----------|--------------|----------------|----------------------|------------------|--------------|
| SMA        | Dako/ CE     | 1A4, mouse  | 1:4000   | w/o          | A              | Smooth muscle cells  | Epithelial cells | M0851        |
| FAP        | Abcam        | EPR20021    | 1:200    | Citrat       | Colon, Mamma   | Stromal fibroblasts  | Cancer cells     | Ab207178     |
| PDGFR beta | Abcam/ RUO   | Y92, rabbit | 1:300    | EDTA         | Prostate       | Stromal cells        | Cancer cells     | Ab32570      |
| Periostin  | Abcam        | EPR19934    | 1:2000   | EDTA         | Colon          | Extracellular matrix | Epithelial cells | Ab219056     |

**Supplementary Table S2.** Univariate cox regression. Bold print marks p-values below 0.05.

| <b>Characteristic</b>       | <b>Borders</b>                           | <b>Hazard Ratio</b> | <b>95 % confidence interval</b> | <b>p - value</b>  |
|-----------------------------|------------------------------------------|---------------------|---------------------------------|-------------------|
| <b>Sex</b>                  | female vs male                           | 0.894               | 0.679 - 1.177                   | 0.425             |
| <b>Age</b>                  | <sup>3</sup> 65 vs < 65                  | 0.888               | 0.667 - 1.183                   | 0.418             |
| <b>Preoperative staging</b> |                                          |                     |                                 | 0.052             |
|                             | borderline vs primarily resectable       | 1.509               | 1.024 - 2.226                   | <b>0.038</b>      |
|                             | Locally advanced vs primarily resectable | 3.780               | 0.525 - 27.208                  | 0.187             |
| <b>Neoadjuvant therapy</b>  | yes vs no                                | 1.296               | 0.826 - 2.034                   | 0.260             |
| <b>pT</b>                   |                                          |                     |                                 | <b>0.004</b>      |
|                             | 2 vs 1                                   | 1.525               | 0.783 - 2.970                   | 0.214             |
|                             | 3 vs 1                                   | 2.342               | 1.226 - 4.475                   | <b>0.010</b>      |
|                             | 4 vs 1                                   | 2.872               | 0.979 - 8.431                   | 0.055             |
| <b>pN</b>                   | 1 vs 0                                   | 2.123               | 1.521 - 2.963                   | <b>&lt; 0.001</b> |
| <b>R</b>                    | <sup>3</sup> 1 vs 0                      | 1.573               | 1.203 - 2.056                   | <b>&lt; 0.001</b> |
| <b>Pn</b>                   | 1 vs 0                                   | 1.432               | 1.013 - 2.025                   | <b>0.042</b>      |
| <b>L</b>                    | 1 vs 0                                   | 1.210               | 0.909 - 1.612                   | 0.192             |
| <b>V</b>                    | 1 vs 0                                   | 1.370               | 1.013 - 1.854                   | <b>0.041</b>      |
| <b>SMA</b>                  | high vs low                              | 1.357               | 1.025 - 1.795                   | <b>0.033</b>      |
| <b>FAP</b>                  | high vs low                              | 1.190               | 0.904 - 1.567                   | 0.216             |
| <b>PDGFR</b>                | high vs low                              | 1.177               | 0.894 - 1.550                   | 0.246             |
| <b>Periostin</b>            | high vs low                              | 1.155               | 0.878 - 1.521                   | 0.304             |
